# A412

**Title:** DOES FIBEROPTIC BUNDLE DESIGN AFFECT THE CLINICAL ACCURACY OF MIXED-VEINOUS OXYGEN SATURATION CATHETERS?  
**Authors:** W.J. Durkan MD and C.R. Turner MD, PhD  
**Affiliation:** Department of Anesthesiology, Naval Hospital, San Diego, CA 92134

**Introduction:** Fiberoptic bundles incorporated into pulmonary artery catheters offer a continuous monitor of mixed venous oxygen saturation which has been demonstrated to reflect mixed venous oxygenation as measured by co-oximetry (1). Systems previously studied employ spectrophotometric analysis via two fiberoptic bundles (Oximetrix catheter, Abbott Critical Care Systems, Mountain View, CA, "O"). A new triple fiber design is intended to increase measurement accuracy (Spectracath, Viggo-Spectramed, Oxnard, CA "S"). We performed a prospective study which compares these catheters in cardiac surgery patients.

**Methods:** After approval by the Institutional Review Board and obtaining informed consent, 40 patients undergoing valve replacement, coronary surgery, or combined procedures were randomized to receive either an O or S catheter. The catheters were pre-calibrated in vitro. Catheters were compared for difficulty of insertion and for the accuracy of the preinsertion calibration. Then catheter SvO<sub>2</sub> measurements were compared to mixed venous blood gas measurements performed on an IL 1312 blood gas analyzer at six time points: pre-bypass, post-bypass, during weaning to 0.8 and 0.6 FiO<sub>2</sub>, and at 8 and 18 hours post-bypass. Measurements of hemodynamic indices, hemoglobin, and core temperature were made. Statistical analysis for the SvO<sub>2</sub> accuracy was by linear regression, Chi square for catheter whip rate, and Student's t-test for comparison of patient demographics, accuracy versus time, and comparison of regression analyses.

**Results:** The two groups of patients were comparable in their demographics, the procedures performed, and baseline hemodynamics. All of the catheters could be inserted in 3 or fewer attempts, and 1 of 20 catheters of each type could not be wedged. The mixed venous oxygen saturations measured by both catheters reflected the saturation as measured by co-oximetry. There were no significant differences between the catheters in the regression of co-oximeter SvO<sub>2</sub> vs catheter SvO<sub>2</sub>. For neither catheter were there any effects on accuracy by varying hemoglobin (6-14.5 gm/dl), cardiac output (2-10 l/min) or temperature (34-38.5°C). The S catheter had 3 of 20 fail due to breakage of the optics versus none of the O catheters (p<0.05). In 8 of 20 S catheters, the PA tracing was complicated by catheter whip, which was significantly greater than the O catheter, 2/20 (p<0.05). The preinsertion calibration of the O catheter was less accurate than that for the S catheter (p<0.05). After recalibration, the catheters were only significantly different at the pre- and post-bypass time points.

**Discussion:** Both catheters in this study provided real-time SvO<sub>2</sub> measurements which correlated to that measured by co-oximetry with coefficients similar to those reported previously (1). The additional fiberoptic cable incorporated into the S catheter has not improved the accuracy over that of the O catheter. Neither catheter posed difficulty with insertion. The O catheter precalibration was less accurate, but the S catheter had a higher rate of catheter failure and a higher rate of confusing PA tracings which may make this catheter less suitable for critical care applications.

**Reference:** 1. J Cardiothorac Anes 1988; 2:440.

**Table 1:** SvO<sub>2</sub> Deviation (Oximetrix vs Spectracath)

| Catheter | T0    | T1    | T2    | T3   | T4   | T5   | T6   |
|----------|-------|-------|-------|------|------|------|------|
| O Mean   | 5.9   | -2.8  | 0.5   | -0.7 | 0.03 | -1.4 | -3.5 |
| SEM      | 1.1   | 1.1   | 1.2   | 1.3  | 1.5  | 1.5  | 0.8  |
| S Mean   | 1.6   | 1.8   | 4.6   | 0.7  | 1.8  | 2.8  | -0.6 |
| SEM      | 1.5   | 1.2   | 1.0   | 1.0  | 0.9  | 1.3  | 1.1  |
| p        | <0.05 | <0.05 | <0.05 | NS   | NS   | NS   | NS   |

# A413

**Title:** NONINVASIVE MONITORING OF MIXED VENOUS OXYGEN SATURATION (SvO<sub>2</sub>) IN INFANTS BY NEAR INFRARED REFLECTANCE SPECTROSCOPY (NIRS)

**Authors:** James M. Steven, MD; C. Dean Kurth, MD; Colin K. Phoon, MD; Susan C. Nicolson MD; Britton Chance, PhD;

**Affiliation:** Departments of Anesthesiology and Biochemistry/ Biophysics, University of Pennsylvania School of Medicine, and The Children's Hospital of Philadelphia, Philadelphia, PA 19104

**Introduction:** As an optical method that noninvasively measures microvascular hemoglobin saturation (tHbO<sub>2</sub>%), NIRS offers the prospect of monitoring tissue oxygen stores, even in infants. Changes in tHbO<sub>2</sub> reflect the oxygen supply/demand relationship in tissue. Therefore we sought to determine the relationship of two means of estimating systemic perfusion, tHbO<sub>2</sub> as assessed in muscle and systemic mixed venous oxygen saturation (SvO<sub>2</sub>) in infants undergoing open heart surgery.

**Methods:** After IRB approval, we studied 8 term infants aged 3-39 days. They were anesthetized with fentanyl and pancuronium, and managed by our standard clinical protocol. SvO<sub>2</sub> was measured by oximetry of the blood passing through the venous return line of the cardiopulmonary bypass (CPB) circuit. tHbO<sub>2</sub> was measured on the anterior thigh by a dual wavelength (760 and 800 nm) NIRS probe. Differences in the absorbance of light at 760 nm with respect to 800 nm ( $\Delta OD_{760-800}$ ) reflect changes in tHbO<sub>2</sub>. As the metabolic needs were altered by anesthesia and cooling on CPB, SvO<sub>2</sub> varied from 68-98% and  $\Delta OD_{760-800}$  was continuously recorded.

**Results:** As shown in figure 1, SvO<sub>2</sub> was linearly related to  $\Delta OD_{760-800}$ . SvO<sub>2</sub> varied from 68-98% as body temperature and CPB flow were changed, and  $\Delta tHbO_2$  was continuously recorded.

**Discussion:** The linear relationship between  $\Delta SvO_2$  and muscle  $\Delta tHbO_2$  suggests that NIRS monitoring of an extremity provides information about global oxygen supply/demand relationship. Because tHbO<sub>2</sub> changed even while SvO<sub>2</sub> was high, muscle may be a more sensitive indicator of changes in O<sub>2</sub> supply/demand than vital organs such as brain, where the magnitude of change in the tHbO<sub>2</sub> during similar changes might be reduced by autoregulation. This technique might prove useful in monitoring therapeutic interventions in shock states in young infants.

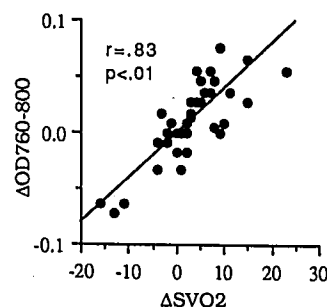

**fig 1.** Relationship of changes in mixed venous oxygen saturation to  $\Delta OD_{760-800}$  measured at the leg.
